# Supplementary material for: Multimodal, broadly neutralizing antibodies against SARS-CoV-2 identified by high-throughput native pairing of BCRs from bulk B cells
Source: PubMed Central journal article supplement — Cell Chem Biol. 2023 Nov 16;30(11):1377–1389.e8. doi: 10.1016/j.chembiol.2023.07.011 (PMC10659930; doi:10.1016/j.chembiol.2023.07.011), 2023-11-16
Supplement: mmc1.pdf [file mmc1.pdf]

**Supplemental information**

**Multimodal, broadly neutralizing antibodies  
against SARS-CoV-2 identified by high-throughput  
native pairing of BCRs from bulk B cells**

**Gladys J. Keitany, Benjamin E.R. Rubin, Meghan E. Garrett, Andrea Musa, Jeff Tracy, Yu Liang, Peter Ebert, Amanda J. Moore, Jonathan Guan, Erica Eggers, Ninnia Lescano, Ryan Brown, Adria Carbo, Hussein Al-Asadi, Travers Ching, Austin Day, Rebecca Harris, Charles Linkem, Dimitry Popov, Courtney Wilkins, Lianqu Li, Jiao Wang, Chuanxin Liu, Li Chen, Jennifer N. Dines, Caroline Atyeo, Galit Alter, Lance Baldo, Anna Sherwood, Bryan Howie, Mark Klinger, Erik Yusko, Harlan S. Robins, Sharon Benzeno, and Amy E. Gilbert**

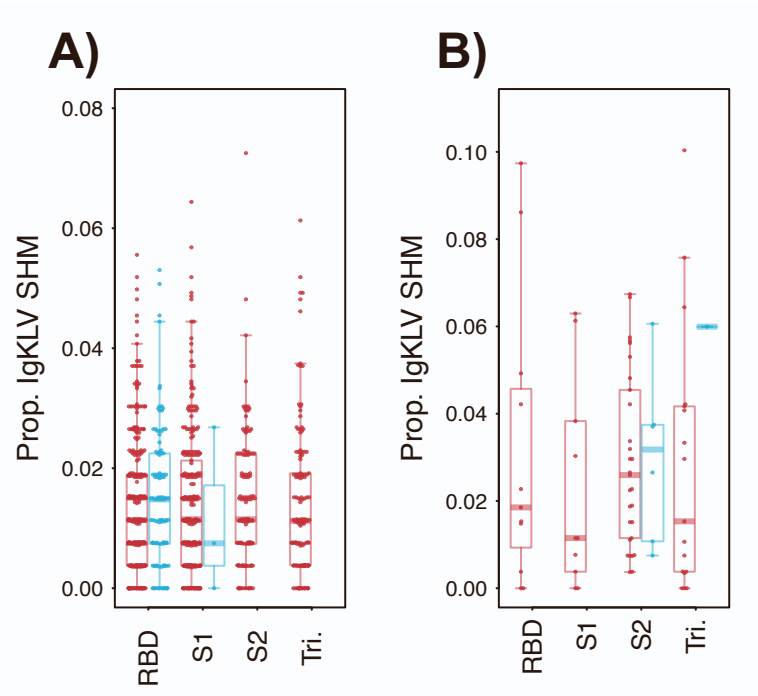

**Figure S1: Light chain SHM.** Related to Figure 1 and Figure 3.

Proportion of sites in light chain V genes in spike-reactive antibodies derived from antigen-enriched memory cells (A) and ASCs (B) that have experienced somatic hypermutation relative to germline.

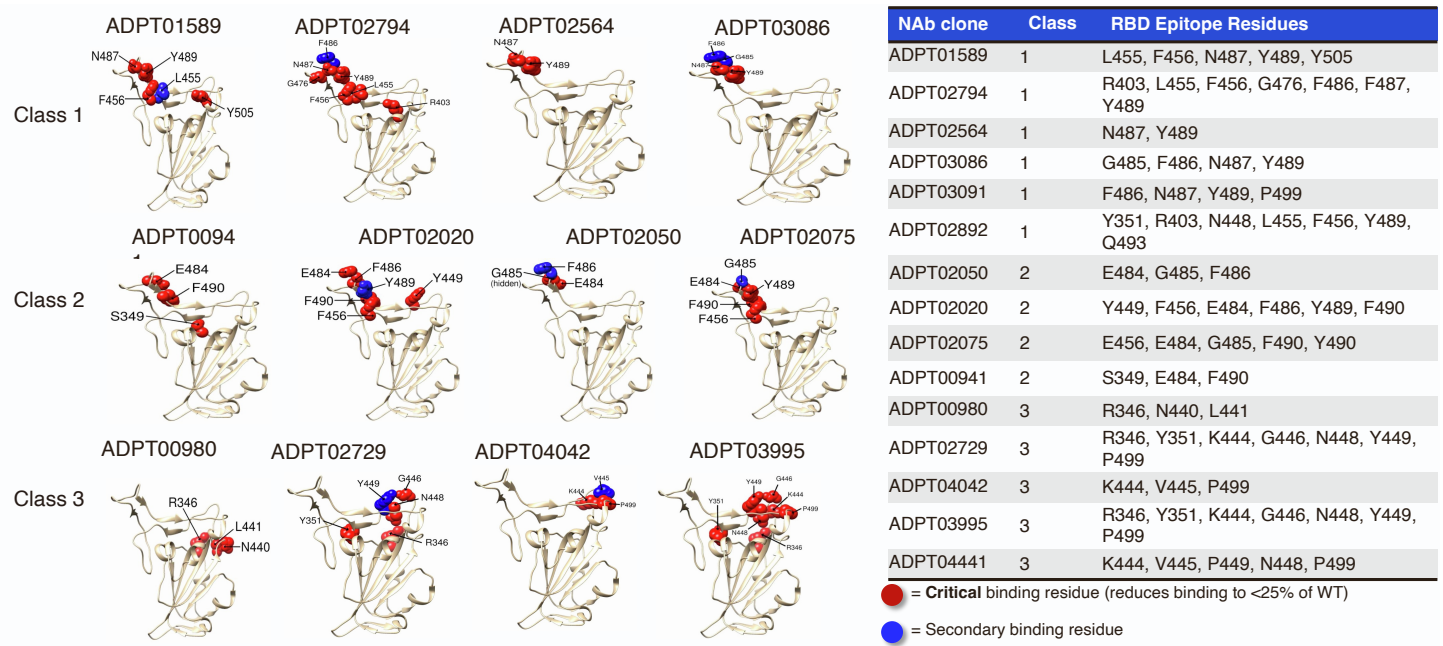

**Figure S2: Identification of critical clones for antibody binding to RBD.** Related to Figure 2.

Binding of each test antibody to each mutant clone in the alanine scanning library was measured in duplicate by high-throughput flow cytometry. To identify critical residues (red circles), a threshold of >70% WT binding to control antibody and <20% WT binding to test antibodies was applied. Secondary residues (blue circles) are highlighted for clones that did not meet the set thresholds but whose decreased binding activity and proximity to critical residues suggested that the mutated residue may be part of the epitope. Summary list of both primary and secondary residues is provided in the table. NAb = Neutralizing Antibody; RBD = Receptor Binding Domain.

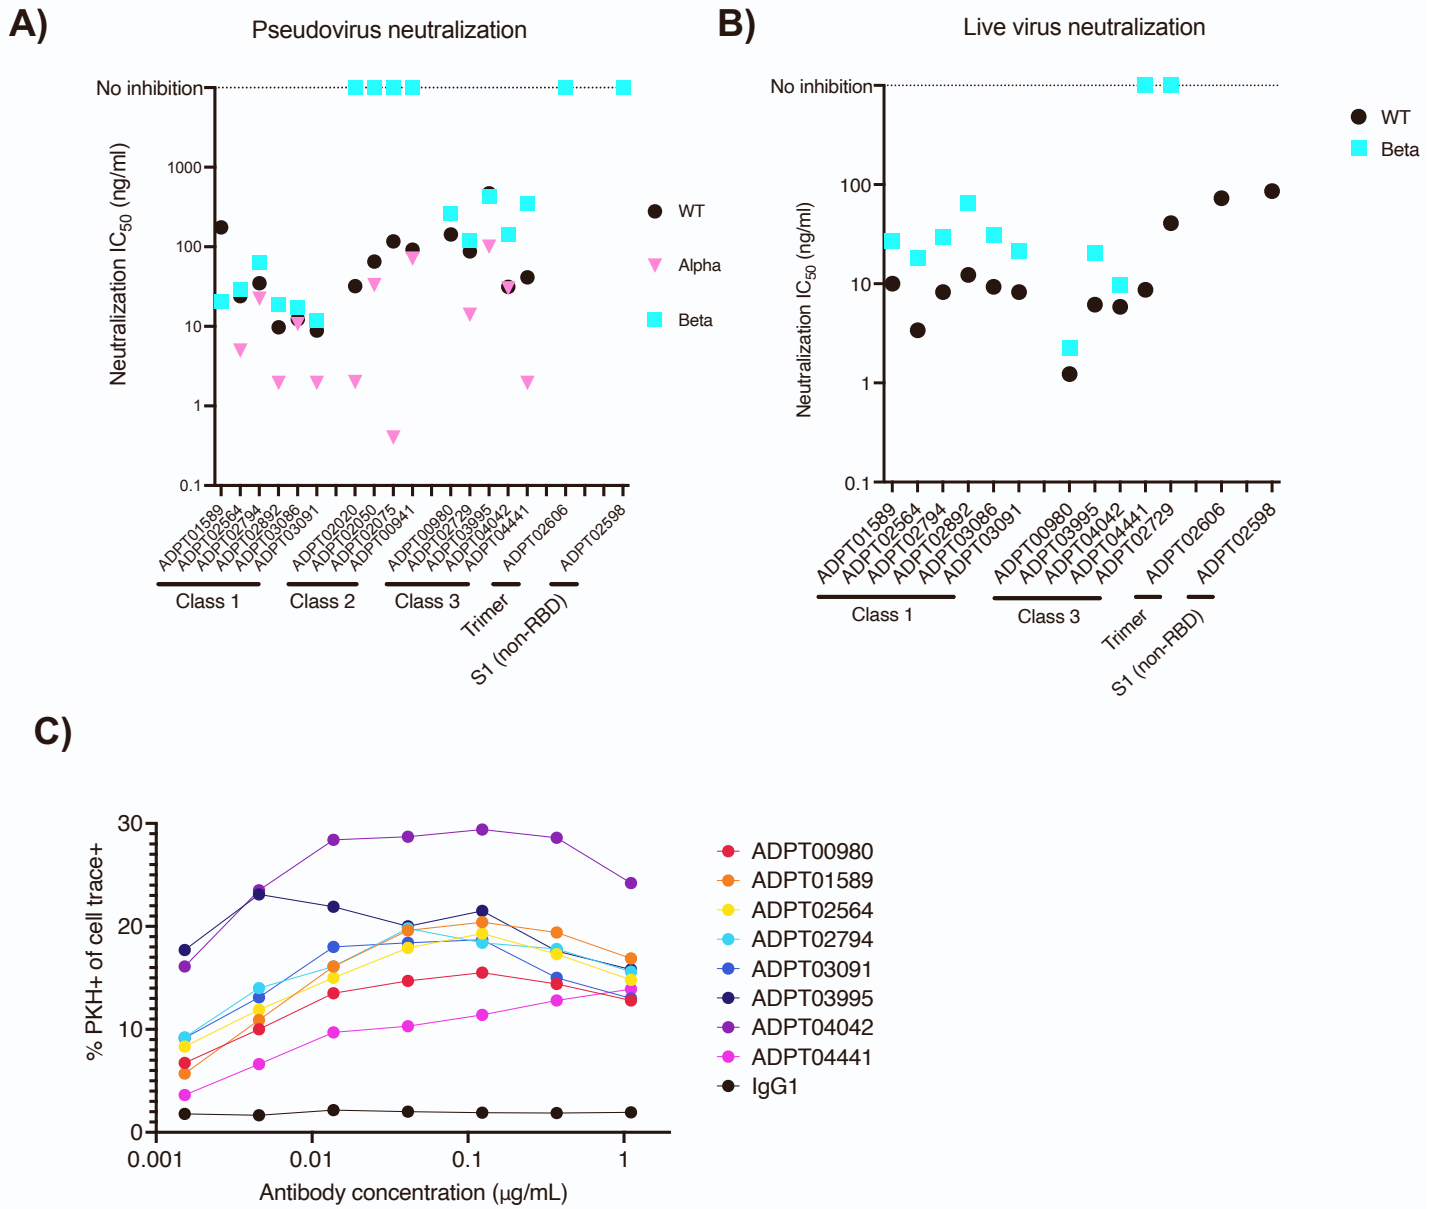

**Figure S3: Pseudovirus and Live virus neutralization and cell-based ADCP function.** Related to Figure 2.

(A) Pseudovirus neutralization shown by IC<sub>50</sub> of WT, Alpha, and Beta variants with lower assay sensitivity of 1,000 ng/mL (B) Live virus neutralization of WT and Beta variants, graph showing calculated IC<sub>50</sub> values with a lower assay sensitivity of 100 ng/mL (C) Plot depicts ADCP activity of each antibody measured as the percentage of PKH67 fluorescent dye-positive events among the Cell Trace Violet dye-positive monocyte effector cells, assessed by flow cytometry. Monocytes were incubated with Cell Trace Violet dye and various amounts of antibody (X axis) and incubated with PKH67-labeled target cells (SARS-CoV-2 S glycoprotein stable HEK293T cells) prior to analysis.

ADCP = antibody-dependent cellular phagocytosis; PKH+ = PKH67 ethanolic dye solution positive

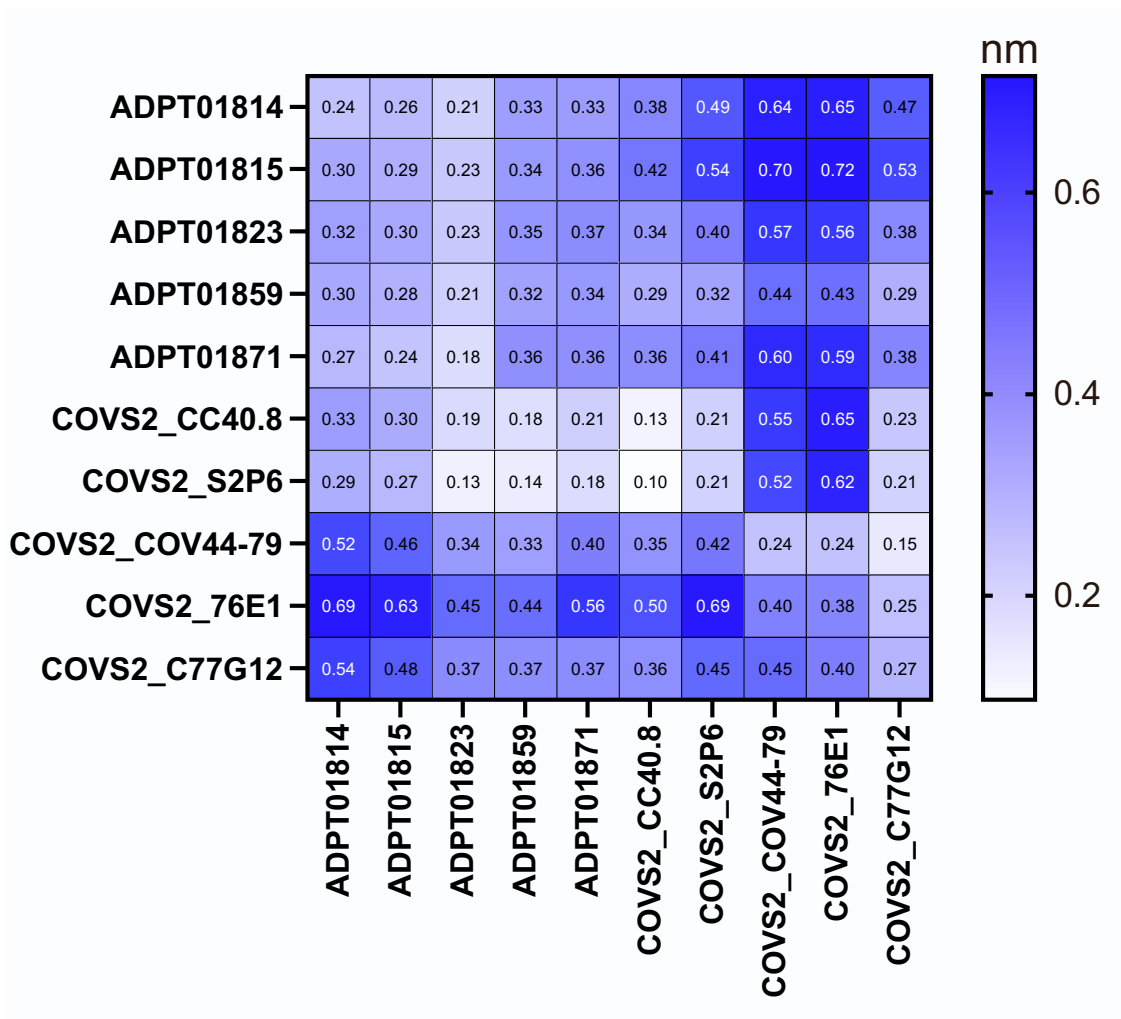

**Figure S4: Epitope binning of S2 antibodies.** Related to Figure 4.

Heatmap showing degree of binding interference between paired antibodies as determined by Octet competition experiments. CC40.8 and S2P6 are previously identified antibodies that bind to the stem helix region of S2 (Zhou, Yuan, et al. 2022; Song et al. 2021; Pinto et al. 2021) and COV44-79, 76E1, and C77G12 target the fusion peptide (Dacon et al. 2022; Sun et al. 2022; Low et al. 2022).

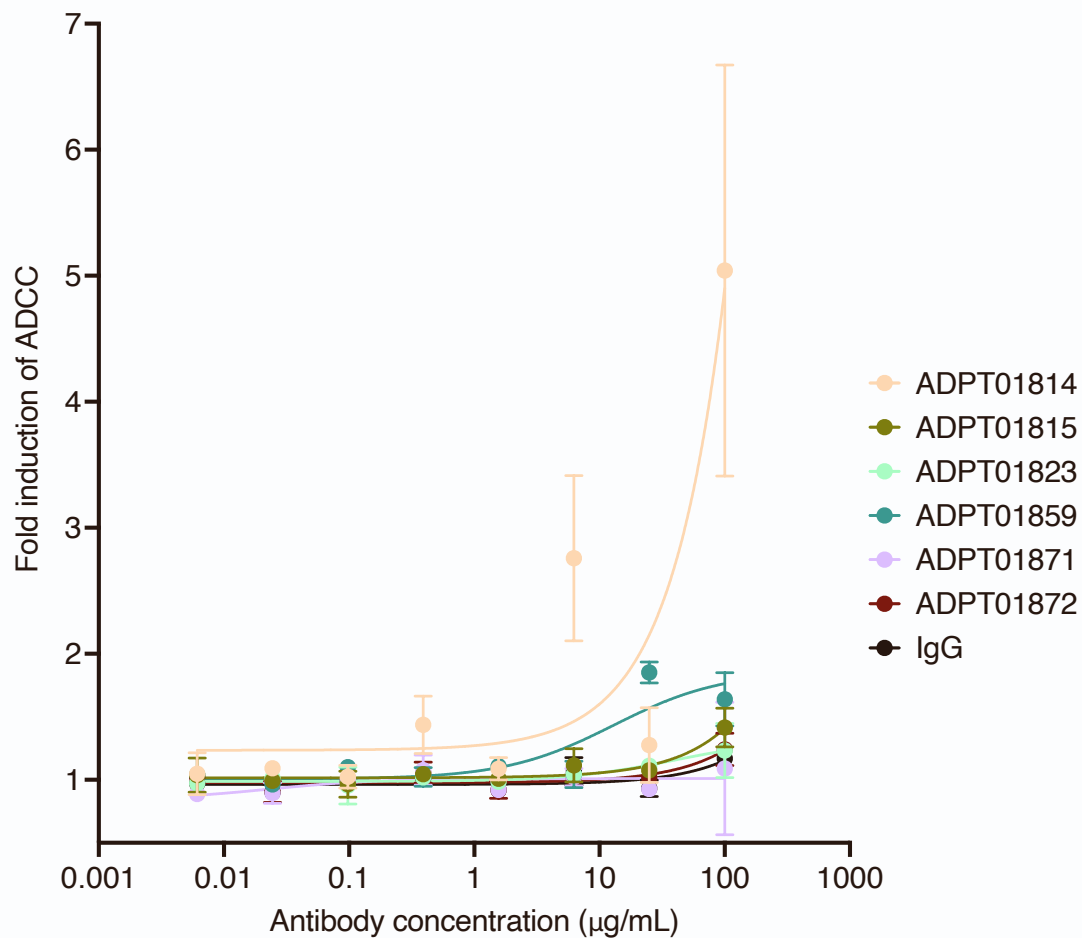

**Figure S5: Cell-based ADCC function.** Related to Figure 4.

In the ADCC assay, fold ADCC induction above background is shown as a measure of luciferase activity in the effector cells quantified with luminescence readout, at different antibody concentrations (X axis). ADCC = antibody-dependent cellular cytotoxicity.

| Antibody Clone | COVID19 Specificity | Biacore K <sub>d</sub> (pM) | Antigen binding EC <sub>50</sub> (pM) | Potency live virus microneutralization IC <sub>50</sub> (pM) |
|----------------|---------------------|-----------------------------|---------------------------------------|--------------------------------------------------------------|
| ADPT02793      | S1                  | 398                         | S1: 113<br>Trimer: 68                 | 11.6                                                         |
| ADPT02025      | S1                  | 7,130                       | S1: 113<br>Trimer: 68                 | 185                                                          |
| ADPT00937      | S1                  | 3,190                       | S1: 64<br>Trimer: 74                  | 128                                                          |
| ADPT01238      | S1                  | 27                          | S1: 28<br>Trimer: 69                  | 471                                                          |
| ADPT02854      | Trimer              | 112                         | S1: no binding<br>Trimer: 152         | 72                                                           |
| ADPT02019      | Trimer              | 57                          | S1: no binding<br>Trimer: 24          | 33                                                           |
| ADPT02024      | Trimer              | 11700                       | S1: no binding<br>Trimer: 665         | 95.1                                                         |
| ADPT02866      | Trimer              | 154                         | S1: no binding<br>Trimer: 182         | 11                                                           |
| ADPT02597      | S1                  | 248                         | S1: 103<br>Trimer: 36                 | 46                                                           |
| ADPT02928      | S1                  | 1420                        | S1: 58<br>Trimer: 24                  | 52                                                           |
| ADPT03011      | S1                  | 4230                        | S1: 157<br>Trimer: 33                 | 24                                                           |
| ADPT02646      | S1                  | 2.96                        | S1: 33<br>Trimer: 24                  | 9                                                            |
| ADPT02381      | Trimer              | 1020                        | S1: no binding<br>Trimer: 33          | 18                                                           |
| ADPT02432      | Trimer              | 243                         | S1: no binding<br>Trimer: 24          | 11                                                           |

**Table S1: Summary data of all the non-RBD antibodies characterized.** Related to Figure 2. IC<sub>50</sub> values for live virus neutralization represent an average of 3-4 experiments.

| Locus | Name             | Sequence                              |
|-------|------------------|---------------------------------------|
| V     | IGL_VL10-54-2_D5 | CTGGGCTCTGCTCCTCCTGACCC               |
| V     | IGL_VL10-54-3_D7 | CCTGGGTCATGCTCCTCCTGAAATCCTCAC        |
| V     | IGL_VL10-67_D6   | GCTCCTCTCCTCCATCTCCACCCTCAC           |
| V     | IGL_VL11_D5      | ATGGCCCTGACTCCTCTCCTCCTCC             |
| V     | IGL_VL1-40_D5    | CTCCTCACTCTCCTCGCTCACTGCACAG          |
| V     | IGL_VL1-41_D5    | TCTCCTCCTCACCCCTTCTCATTCACTGCACAG     |
| V     | IGL_VL1-47_D5    | CCTCTCCTCCTCACCCCTCCTCACTCACTG        |
| V     | IGL_VL2-14_D5    | TCTGCTGCTCCTCACTCTCCTCACTCGG          |
| V     | IGL_VL2-33_D5    | CTCTGCTGCTCCTCACYCTCCTCACTCAG         |
| V     | IGL_VL2-34_D5    | CTCTGCTCCTYCTCACCCCTCCTCACTCAG        |
| V     | IGL_VL3-1_D5     | GCATGGATCCCTCTCTTCTCCTCGGCGTC         |
| V     | IGL_VL3-10_D5    | ATGGCCTGGAYCCCTYTCCTGCTC              |
| V     | IGL_VL3-12_D5    | CCTCTCCTCCTCAGCCTCCTCGC               |
| V     | IGL_VL3-19_D5    | GCCTGGACCCCTCTCTGGCTCAC               |
| V     | IGL_VL3-2_D5     | CTCCCCTGCTCACCCCTCCCGAC               |
| V     | IGL_VL3-21_D5    | CTGGACCGTTCTCCTCCTCGGCC               |
| V     | IGL_VL3-22_D8    | CACACTCCTGCTCCCCTCCTCAACC             |
| V     | IGL_VL3-24_D7    | GGCCCCTCTTTTCTTGGTGTCTGAC             |
| V     | IGL_VL3-25_D5    | CTCTACTTCTCCCCCTCYTCACTCTCTGCACAG     |
| V     | IGL_VL3-30_D5    | ATGACCTTGCTGCAGGGTGAGGGG              |
| V     | IGL_VL3-9_D5     | GCTCTCCTTCTGAGCCTCCTTGCTCACTTTACAG    |
| V     | IGL_VL4-3_D7     | CCTGGGTCTCCTTCTACCTACTGCCCTTC         |
| V     | IGL_VL4-60_D5    | CTCTTCCCTCTCCTCCTCCACTGCACAG          |
| V     | IGL_VL4-69_D5    | CCTCACCCCTCCTCCTCCACTGCACAG           |
| V     | IGL_VL5_D5       | CTCTCCTCCTCCTGYTCCTCTCTCACTGC         |
| V     | IGL_VL6_D5       | CACTACTTCTCACCCCTCCTCGCTCACTGC        |
| V     | IGL_VL7_D5       | CTCTCTTTCTGTTCTCCTCACTTGCTGCCAG       |
| V     | IGL_VL8_D5       | GATGCTTCTCCTCGGACTCCTTGCTTATGGATCAG   |
| V     | IGL_VL9_D5       | CCTGGGCTCCTCTGCTCCTCACC               |
| V     | IGL_VL5-52_D2    | GGCCTGGACTCTTCTCCTTCTCGTGC            |
| V     | IGL_VL5-37_D3    | TGGCCTGGACTCCTCTTCTTCTTCTTGCTC        |
| V     | IGL_VL3-24_D9    | CCTCTTTTCTTGGTCTCCTGACTCACTGCC        |
| V     | IGK_VK1-12_D5    | ATGGACATGATGGTCCCCGCTCAGCTC           |
| V     | IGK_VK1-16_D5    | ATGGACATGAGRGTCTCGCTCAGCTC            |
| V     | IGK_VK1-2_D5     | TGAGGSTCCCYGCTCAGCTCC                 |
| V     | IGK_VK1-22_D5    | ATGGACATGAGGGTCCCCACTCAGCTC           |
| V     | IGK_VK1-27_D5    | ATGGACATGAGGGCCCCCGCTC                |
| V     | IGK_VK1-43_D6    | CTGCTGCTCTGGTTCCCAGGTGC               |
| V     | IGK_VK2-24_D5    | TGCTCAGCTYCTGGGGCTGCTAATGC            |
| V     | IGK_VK3-11_D5    | GCKCAGCTTCTCTTCTCCTGCTACTCTG          |
| V     | IGK_VK3-25_D6    | YCATTCTTTATGTTACTCTGGGTCCCAGATTTCACTG |
| V     | IGK_VK3-31_D6    | AGCTCAGCTGCTTTGATTCTTGTACTCTGGCTC     |
| V     | IGK_VK3-34_D6    | CTCAGCTCCTCTCCTTTCTGGTACTCTGGCTC      |



|   |                         |                                    |
|---|-------------------------|------------------------------------|
| V | IGK_VK3-7_D5            | CCCAGCACAGCTTCTTCTTCCTCCTGC        |
| V | IGK_VK4_D5              | ATGGTGTTCAGACCCAGGTCTTCATTTCTCTG   |
| V | IGK_VK5_D7              | CCTCAGCTTCCTCCTCCTTTGGATCTCTGATACC |
| V | IGK_VK6_D7              | GCTCTGGGTTCCAGCCTCCAGG             |
| V | IGK_VK7_D7              | CTCCTGCTCTGGGCTCCAAGCTG            |
| V | IGH_V1-17-01_D1         | CTGGGGGATCCTCTTCTTGGTGGCATC        |
| V | IGH_VH1L-17-02_D2       | GGGGATCCTCTTCTTGGTGGCAGCTG         |
| V | IGH_V3-22_D1            | GGAGTCATGGCTGAGCTGGGTTTTTCTTGC     |
| V | IGH_VH1L-03SS_D5        | CCTCTTTTTGGTGGCAGCAGCCACAG         |
| V | IGH_VH1L-18SS_D5        | GCATCCTTTTTCTTGGTGGCAGCAGCAAC      |
| V | IGH_VH1L-45-2SS_D6      | CTCTTCTTGGTGGCAGCAGCCACAG          |
| V | IGH_VH1L-46-02SS_D1     | GGTCTTCTGCTTGCTGGCTGTAGCACC        |
| V | IGH_VH1L-46SS_D5        | GGTCTTCTGCTTGCTGGCTGTAGCTCC        |
| V | IGH_VH1L-58SS_D5        | GTCCTCTTCTTGGTGGGAGCAGCGAC         |
| V | IGH_VH1L-69SS_D5        | CATGGACTGGACCTGGAGGTTCTCTTTG       |
| V | IGH_VH1L-8SS_D5         | GGATCCTCTTCTTGGTGGCAGCAGCTAC       |
| V | IGH_VH1L-FSS_D8         | CCTCCTCTTGGTGGCAGCAGCTACAG         |
| V | IGH_VH2L-05SS_D5        | CACTTTGCTCCACGCTCCTGCTGC           |
| V | IGH_VH2L-26SS_D5        | GACACACTTTGCTACACACTCCTGCTGC       |
| V | IGH_VH2L-5-4-6SS_D2     | ATGGACATACTTTGTTCCACGCTCCTGCTGC    |
| V | IGH_VH2L-70SS_D5        | ATGGACATACTTTGTTCCACGCTCCTGCTAC    |
| V | IGH_VH3L-09SS_D5        | GTTGGGACTGAGCTGGATTTTCCTTTTGGC     |
| V | IGH_VH3L-15-0102SS_D1   | GGCTGAGCTGGATTTTCCTTSCTGC          |
| V | IGH_VH3L-21SS_D5        | GCTCCGCTGGGTTTTCTTGTGTC            |
| V | IGH_VH3L-23SS_D5        | GGGCTGAGCTGGCTTTTTCTTGTGGC         |
| V | IGH_VH3L-43SS_D5        | GTTTGGACTGAGCTGGGTTTTCTTGTGTC      |
| V | IGH_VH3L-48SS_D1        | GTTGGGGCTGTGCTGGGTTTTCTTG          |
| V | IGH_VH3L-64D-06SS_D1    | GGAGTTCTGGCTGAGCTGGGTTCTCC         |
| V | IGH_VH3L-72-49SS_D5     | GAGTTTGGGCTKAGCTGGGTTTTCTTG        |
| V | IGH_VH3L-DSS_D5         | TTGTGCTGAGCTGGGTTTTCTTGTGG         |
| V | IGH_VH3L-FSS_D5         | GGGCTGAGCTGGGTTTTCTYGTGTC          |
| V | IGH_VH4-34-05SS_D1      | CTTCCTGCTCCTGGTGGCAGCTC            |
| V | IGH_VH4-38-2-02SS_D1    | GTTTTCTCCTGCTGGTGGCAGCTC           |
| V | IGH_VH4-59-0102SS_D1    | GGTTCTTCTTCTCCTGGTGGCAGCTC         |
| V | IGH_VH4L-1SS_D5         | GTTCTTCTCCTSCTGGTGGCAGCTC          |
| V | IGH_VH4L-39SS_D1        | GGTTCTTCTCCTGCTGGTGGCG             |
| V | IGH_VH4L-4-02SS_D1      | GGTTCTTCTCCTCCTGGTGGCAGCTC         |
| V | IGH_VH5L-10-0-01-2SS_D1 | GGGCCTCTCCACTTAAACCCAGGCTC         |
| V | IGH_VH5L-51SS_D5        | GGGTCAACCGCCATCCTCGC               |
| V | IGH_VH6L-01SS_D5        | CTCCTTCTCATCTTCTGCCCCTGC           |
| V | IGH_VH6L-1-02SS_D3      | TCTGTCTCCTTCTCATCTTCTGCCGTG        |
| V | IGH_VH7L-04SS_D5        | CACCATGGACTGGACCTGGAGGATCC         |
| C | R_IGK_C                 | CATCAGATGGCGGGAAGATGAAGACAGATGGTGC |
| C | IGLC7-01_D03            | CAGAGGAGGGCGGGAACAGAGTGAC          |

|   |                 |                                |
|---|-----------------|--------------------------------|
| C | R_IGL_C         | CCTCAGAGGAGGGTGGGAACAGAGTGAC   |
| C | IGHA1_D03       | GCTGGGTGCTGCAGAGGCTC           |
| C | IGHA2_D06       | AGCGGGAAGACCTTGGGGCTG          |
| C | IGHD_D05        | CCTGATATGATGGGGAACACATCCGGAGCC |
| C | IGHE_D08        | CGGGTCAAGGGGAAGACGGATGG        |
| C | IGHG1_D04       | GTGCCAGGGGAAGACCGATGG          |
| C | IGHG4/G3/G2_D03 | GCTCCTGGAGCAGGGCGC             |
| C | IGHGP_D04       | GCACCAGGGGAAGACCGATGG          |
| C | IGHM_D06        | CGACGGGAATTCTCACAGGAGACGAGG    |

**Table S2: List of primers used for antibody heavy and light chain amplification.** Related to Figure 1

| Antibody Clone | Identifier | IgH                                                                                                                                               | IgKL                                                                                                                              |
|----------------|------------|---------------------------------------------------------------------------------------------------------------------------------------------------|-----------------------------------------------------------------------------------------------------------------------------------|
| ADPT00980      | AB_2940970 | QVQLVESGGGVVQPGRSLRLSCAASGF<br>TFSRYGMHWVRQAPGKGLEWVALISSG<br>GSNKYYADSVKGRFTISRDNKNTLYLE<br>MNSLRAEDTAVYYCAKDAIYDIWGAYR<br>ENWFDWPWGQGLTVTVSS    | DIQMTQSPSSLSASVGDRTITCRAS<br>QSIISNYLNWYQQKPGKAPNLLIYAASS<br>LQSGVPSRFSGSGSGTDFTLTISSLQP<br>EDFATYYCQQTSSPPLTFGQGKVEI<br>K        |
| ADPT01589      | AB_2940989 | EVQLVESGGGLIQVGGSLRLSCAASGLT<br>VTSNYMNWVRQGPQKGLEWVSLIYSSG<br>TTYADSVKGRFTISRDDSKNTLYLQMN<br>SLRAEDTAVYYCARPIVGARSGMDVWG<br>QGTAVTVSS            | DIQMTQSPSSLSASVGDRTITCQAS<br>QDINKYLNWYQQKPGKAPKLLIYDAS<br>NLETGVPSRFSGSGSGTDFFTISSLQ<br>PEDLATYYCHQFDNLPQTFGGGKVE<br>IK          |
| ADPT01814      | AB_2940990 | QVQLQESGPGLVKPSSETLSLTCSVSGGS<br>INYYYWSWIRQTPGQGLEWIGFIYSSGTT<br>NYNPSLKSRTMSKDTAKKQFSLKLTSTV<br>TAADSAVYYCARHSRSTNGVCQTYYY<br>YALDVWGHGTTTVTVSS | QSVLTQPPSVSGAPGQRVTISCTGSG<br>SNIGSGYDVHWYQQLPGRAPKLLIYR<br>NRNRPSGVPDRFSGSKSGTSASLAIA<br>GLQSEDEGDYFCQSYDGRGLES AVF<br>GGGTRLTVL |
| ADPT01815      | AB_2940991 | QVQLQESGPGLVKPSSETLSLTCSVSGGS<br>INYYYWSWIRKSPGKGLEWIGFIYSSGTT<br>NYNPSLKSRSVMSIGTSKRQFSLKLSVT<br>AADSAVYYCARHSRSTNGVCQTYYYY<br>ALDVWGHGTTTVTVSS  | QSVLTQPPSVSGAPGQRVTISCTGSS<br>SNIGAGYDVHWYQQLPGTAPKLLIYA<br>NTHRPSGVPDRFSASKSGTSASLAIA<br>GLQAEDEGDYFCQSYDGSLS AVF<br>GGGTRLTVL   |
| ADPT01823      | AB_2940992 | EVQLVESGGGLVKPGGSLRLSCVASGFS<br>FGLYTMNWVRQAPGKGLEWVSYISSSTS<br>YKYYADSVKGRVSVSRDNAKNSLYLQLN<br>GLRVEDTAVYYCARDGYCPNGICTYYGM<br>DVWGQGTTVTVSA     | EIVMTQSPATLSVSPGERATLSCRAS<br>QSVSSNLAWYQQKPGQAPRLLIYGAS<br>TRATGIPARFSGSGSGTEFTLTITGLQ<br>SEDFAVYYCQQYDKWPPAYSFGQGT<br>KVEIK     |
| ADPT01859      | AB_2940993 | EVQLVESGGGLVKPGGSLRLSCAASGFS<br>FNTYTMNWVRQAPGKGLEWVSYISSSS<br>SYKYYSDSVKGRFSVSRDNAKNSLYLQM<br>NGLRAEDTAVYYCARDGYCPNGVCTYY<br>GMDVWGQGTTVTVSL     | EIVMTQSPATLSVSPGERATLSCRAS<br>QSVSSNLAWYQQKPGQAPRLLIYGAS<br>TRATGIPARFSGSGSGTEFTLTISGLQ<br>SEDFAVYYCQQYSKWPPAYTFGQGT<br>KLEIK     |
| ADPT01871      | AB_2940994 | EVQLVESGGGLVKPGGSLRLSCVASGFS<br>FSIYSMNWVRQAPGKGLEWVSYISSSS<br>YKYYADSVKGRFSVSRDNAKNSLYLQLN<br>GLRAEDTAVYYCARDGYCPKGVCTYYG<br>MDVWGQGTTVTVSA      | EIVMTQSPATLSVSPGERVTLSCRAS<br>QSVRSRLAWFQQKPGQAPRLLIYDAS<br>IRATGIPARFSGSGSGTEFTLISSLQS<br>EDFAVYYCQQYDNWPPAYTFGQGT<br>LEIK       |
| ADPT01872      | AB_2940995 | EVQLVESGGGLVKPGGSLRLSCAASGFS<br>FSLYTMNWVRQAPGKGLEWVSYISSSS<br>YRYADSVKGRFSVSRDNAKNALYLQM<br>NGLRAEDTAVYYCARDGYCPRGVCTYY<br>GMDVWGQGTTVTVSA       | EIVMTQSPATLSVSPGERATLSCRAS<br>QSVGSRLAWYQQKPGQAPRLLIYDAS<br>IRATGIPARFSGSGSGTDFTLTISGLQS<br>EDFAVYYCQRYNNWPPAYTFGQGT<br>LEIK      |
| ADPT02564      | AB_2940996 | QVQLVQSGAEVKKPGSSVRVSKASGG<br>TFISYTFNWVRQAPGQGLEWMGRIPIFG<br>IVNYAQKFQGRVTIAADKSTSTAYMELSS<br>LRSEDTAMYYCATATVDYDSGEEQSSFD<br>PWGQGLTVTVSS       | EIVLTQSPGTLSPGERATLSCRASQ<br>SVSSSYLAWYQQKAGQTPRLLIYAAS<br>SRATGVPDRFSGSGSGTDFTLTISRLE<br>AEDFAVYYCQQSWTFGQGTKEIK                 |
| ADPT02598      | AB_2940997 | QVQLQESGPGLVKPSGTLSTLCVSGGS<br>ISSNWWWVVRQPPGKGLEWIGETFHS<br>GSFNYNPSLKSRTISVDKSKNQFSLKLS<br>SVTAADTAIYYCATRVGYEGHFYYYYGM<br>DVWGQGTTVTVSS        | DIQMTQSPSSVSASVGDRTITCRAS<br>QGISSWLAWYQQKPGKAPKLLIYAAS<br>SLQSGVPSRFSGSGSGTDFTLTISSLQ<br>PEDFATYYCQANRFPWTFGQGTKV<br>EIK         |
| ADPT02606      | AB_2940998 | EVQLVESGGGLVKPGGSLRLSCAASGFT<br>FSSYSMNWVRQAPGKGLEWVSSITSSS<br>GYMYADSVKGRFTISRDNKNSLYLQL                                                         | EIVMTQSPATLSVSPGERATLSCRAS<br>QSVSSNLAWYQQKPGQAPRLLIYGAS<br>TRATGIPARFSGSGSGTEFTLTISLQ                                            |

|           |            |                                                                                                                                                |                                                                                                                                  |
|-----------|------------|------------------------------------------------------------------------------------------------------------------------------------------------|----------------------------------------------------------------------------------------------------------------------------------|
|           |            | NSLRAEDTAVYYCAKDSAFDLWEVRSYY<br>YVMDVWGQGTTVTVSS                                                                                               | SEDFALYYCQQYNNWPRTFGQGTKL<br>EIK                                                                                                 |
| ADPT02794 | AB_2940999 | QVQLVQSGAEVKKPGSSSLKVSCKASGG<br>TFNNFAISWVRQAPGQGPEWMGRINPIL<br>SAAKYAQKFQGRLLTITADKSTTTAYMELS<br>SLRSEDVAVYYCAPTGTGESWWFDPWG<br>QGTLVTVSS     | QSVLTQPPSASGTPGQRVTISCSGSS<br>SNIGTNYVYQQLPGTAPKVLIIYGN<br>NQRPSGVPDRFSGSKSGSSASLAISG<br>LRSEDEADYYCAAWDDSLSGPVFGG<br>GTKLTVL    |
| ADPT03091 | AB_2941000 | QMQLVQSGPEVKKPGTTSVKVSCASGF<br>TFSSSAVQWVRQARGQGLEWIGWIVVG<br>SGNANYAQKLQERVSITRDMSTSTAYME<br>LSSLRPEDTAVYYCAAPHCSRITICHDFG<br>DMWGQGTMTVTVSS  | EIVLTQSPGTLSPGERATLSCRASQ<br>SVRSSLAWYQQKPGQAPRLLMFVA<br>SSRATGIPDRFSGSGSGTDFTLTISRL<br>EPEDFAVYYCQQYDTSPTWTFGGGTK<br>VEIK       |
| ADPT03995 | AB_2941001 | EVQLVQSGAEVKKPGSSVKVSCASGG<br>TFSMHTIRWVRQAPGQGLEWMGRIIPML<br>GIVNYAQKFQGRVTISADKSTSTAYMELS<br>SLTSEDVAVYYCAKGSVDVFDIWGQGT<br>MVTVSS           | DIQMTQSPSTLSASVGDRTITCRASQ<br>SISSWLAWYQQKPGKAPKLLIYDASSL<br>ESGVPSRFSGSGSGTEFTLTISLQPD<br>DFATYYCQQYNSYSPITFGQGRLEIK            |
| ADPT04042 | AB_2941002 | QITLKESGPTLVKPTQTLTCTFSGFSL<br>SGGVGVGWIRQPPGKALEWLALIYWDD<br>DKRYRPSLKSRLTITRDTSTNQVLTMTN<br>MDPVDTATYFCARHQIATVFDHWGQGT<br>VTVSS             | QSALTQPASVSGSPGQSITISCTGTSS<br>DVGGYNYVSWYQQHPGKAPKLMIIYE<br>VSNRPSGVSSRFSGSKSGNTASLTIS<br>GLQAEDEADYYCSSYTRSSPLVAFGG<br>GTKVTVL |
| ADPT04441 | AB_2941003 | EVQLVESGGGLVQPGRSLRLSCAASGLT<br>FEDYAMHWVRQPPGKLEWVSGVSWN<br>SGTIGYADSVKGRFTISRDNKNSLYLHM<br>RSLGAEDTAVYYCAKDMGGRFSFFSLE<br>NDAFDIWGQGTMTVIVSS | SYELTQPPSVSVSPGQTARITCSGDA<br>LPKQSTYVYQKPGQAPVLVIYKDI<br>RPSGIPERFSGSSGTTVTLTISGVQA<br>EDEADYYCQSADSSDITYVFGTGKVT<br>VL         |

**Table S3: List of antibody heavy and light chain sequences.** Related to Figures 5 and 6

### Supplemental References

1. Dacon, Cherelle, Courtney Tucker, Linghang Peng, Chang-Chun D. Lee, Ting-Hui Lin, Meng Yuan, Yu Cong, et al. (2022). Broadly Neutralizing Antibodies Target the Coronavirus Fusion Peptide. *Science* 377, 728-735.
2. Low, Jun Siong, Josipa Jerak, M. Alejandra Tortorici, Matthew McCallum, Dora Pinto, Antonino Cassotta, Mathilde Foglierini, et al. (2022). ACE2-Binding Exposes the SARS-CoV-2 Fusion Peptide to Broadly Neutralizing Coronavirus Antibodies. *Science* 377, 735–42.
3. Pinto, Dora, Maximilian M. Sauer, Nadine Czudnochowski, Jun Siong Low, M. Alejandra Tortorici, Michael P. Housley, Julia Noack, et al. (2021). Broad Betacoronavirus Neutralization by a Stem Helix–Specific Human Antibody. *Science* 373, 1109–16.
4. Song, Ge, Wan-ting He, Sean Callaghan, Fabio Anzanello, Deli Huang, James Ricketts, Jonathan L. Torres, et al. (2021). Cross-Reactive Serum and Memory B-Cell Responses to Spike Protein in SARS-CoV-2 and Endemic Coronavirus Infection. *Nature Communications* 12, 2938.
5. Sun, Xiaoyu, Chunyan Yi, Yuanfei Zhu, Longfei Ding, Shuai Xia, Xingchen Chen, Mu Liu, et al. (2022). Neutralization Mechanism of a Human Antibody with Pan-Coronavirus Reactivity Including SARS-CoV-2.” *Nature Microbiology* 7, 1063–74.
6. Zhou, Panpan, Meng Yuan, Ge Song, Nathan Beutler, Namir Shaabani, Deli Huang, Wan-ting He, et al. (2022). A Human Antibody Reveals a Conserved Site on Beta-Coronavirus Spike Proteins and Confers Protection against SARS-CoV-2 Infection. *Science Translational Medicine* 14, eabi9215.
